# Supplementary material for: Glucosamine Use Is Associated with a Higher Risk of Cardiovascular Diseases in Patients with Osteoarthritis: Results from a Large Study in 685,778 Subjects
Source: MDPI journal article supplement (doi:10.3390/nu14183694), 2022-09-07
Supplement: s1 [file s1]

## Supplementary Materials

**Table S1.** The distribution of period time from diagnosis of osteoarthritis to starting taking glucosamine

**Table S2.** The items and weights in Charlson Comorbidity Index (CCI)

**Table S3.** Incidence of cardiovascular disease (CVD) events

**Table S4.** Association of glucosamine use with cardiovascular disease (CVD) in subgroups

**Table S5.** Characteristics of the study population after 1:2 propensity score matching

**Table S6.** Incidence of CVD events after 1:2 propensity score matching

**Table S7.** Association of glucosamine use with CVD adjusting for adherence of antidiabetic drugs

**Table S8.** Association of glucosamine use with CVD excluding patients with <2 years follow-up period

**Table S9.** Association of glucosamine use with CVD including all patients newly diagnosed with osteoarthritis.

**Table S10.** Association of glucosamine use with CVD from the diagnosis of osteoarthritis to the outcomes.

**Table S1.** The distribution of period time from diagnosis of osteoarthritis to starting taking glucosamine.

| T          | Glucosamine users, <i>n</i> (%) |                    |               |                 |
|------------|---------------------------------|--------------------|---------------|-----------------|
|            | Non-adherent                    | Partially adherent | Adherent      | Overall         |
| 0 *        | 93,050 (48.21)                  | 16,604 (42.17)     | 3,502 (43.65) | 113,156 (47.07) |
| <1 month   | 18,820 (9.75)                   | 4,343 (11.03)      | 1,062 (13.24) | 24,225 (10.08)  |
| 1-3months  | 21,232 (11.00)                  | 5,199 (13.20)      | 1,077 (13.42) | 27,508 (11.44)  |
| 3-6months  | 23,037 (11.93)                  | 5,356 (13.60)      | 1,065 (13.27) | 29,458 (12.25)  |
| 6-12months | 36,885 (19.11)                  | 7,870 (19.99)      | 1,317 (16.42) | 46,072 (19.16)  |

T indicated the period time from diagnosis of osteoarthritis to starting taking glucosamine. The values were all 0 in glucosamine non-users. The HRs were adjusted for age, sex, hypertension, medication, Charlson Comorbidity Index (CCI), and health care utilization index (HCUI). \* "0" indicated starting glucosamine immediately after the diagnosis of osteoarthritis.

**Table S2.** The items and weights in Charlson Comorbidity Index (CCI).

| The items in CCI                 | Scores (Weights) |
|----------------------------------|------------------|
| Myocardial infarction            | 1                |
| Congestive heart failure         | 1                |
| Peripheral vascular disease      | 1                |
| Cerebrovascular disease          | 1                |
| Dementia                         | 1                |
| Chronic pulmonary disease        | 1                |
| Connective tissue disease        | 1                |
| Ulcer disease                    | 1                |
| Mild liver disease               | 1                |
| Diabetes                         | 1                |
| Hemiplegia                       | 2                |
| Moderate or severe renal disease | 2                |
| Diabetes with end organ damage   | 2                |
| Any tumor without metastasis     | 2                |
| Leukemia                         | 2                |
| Lymphoma                         | 2                |
| Moderate or severe liver disease | 3                |
| Metastatic solid tumor           | 6                |
| AIDS                             | 6                |

**Table S3.** Incidence of cardiovascular disease (CVD) events.

|                    | Overall CVD   |                                           | CHD           |                                           | Stroke        |                                           |
|--------------------|---------------|-------------------------------------------|---------------|-------------------------------------------|---------------|-------------------------------------------|
|                    | No. of events | Incidence per 1,000 person-years (95% CI) | No. of events | Incidence per 1,000 person-years (95% CI) | No. of events | Incidence per 1,000 person-years (95% CI) |
| Non-glucosamine    | 40,858        | 15.08 (14.93, 15.23)                      | 16,686        | 6.01 (5.91, 6.10)                         | 11,742        | 4.21 (4.13, 4.28)                         |
| Glucosamine        | 23,742        | 16.63 (16.42, 16.84)                      | 9,844         | 6.72 (6.59, 6.85)                         | 6,090         | 4.13 (4.03, 4.23)                         |
| Non-adherent       | 17,751        | 15.47 (15.24, 15.70)                      | 7,399         | 6.30 (6.16, 6.44)                         | 4,554         | 3.85 (3.74, 3.97)                         |
| Partially adherent | 4,657         | 19.99 (19.41, 20.56)                      | 1,874         | 7.78 (7.43, 8.14)                         | 1,183         | 4.88 (4.60, 5.15)                         |
| Adherent           | 1,334         | 28.18 (26.67, 29.69)                      | 571           | 11.47 (10.53, 12.41)                      | 353           | 7.00 (6.27, 7.73)                         |

CVD, cardiovascular disease; CHD, coronary heart disease; CI, confidence interval.

**Table S4.** Association of glucosamine use with cardiovascular disease (CVD) in subgroups.

| Subgroup  | HR (95% CI) for CVD |                    |                   | P for trend |
|-----------|---------------------|--------------------|-------------------|-------------|
|           | Non-adherent        | Partially adherent | Adherent          |             |
| All       | 1.03 (1.02, 1.05)   | 1.26 (1.22, 1.30)  | 1.68 (1.59, 1.78) | <0.001      |
| Age       |                     |                    |                   |             |
| <60 years | 1.00 (0.97, 1.03)   | 1.12 (1.06, 1.19)  | 1.62 (1.46, 1.80) | <0.001      |
| ≥60 years | 1.02 (1.00, 1.04)   | 1.23 (1.19, 1.28)  | 1.59 (1.49, 1.70) | <0.001      |
| Sex       |                     |                    |                   |             |
| Female    | 1.03 (1.01, 1.06)   | 1.25 (1.19, 1.30)  | 1.76 (1.64, 1.89) | <0.001      |
| Male      | 1.06 (1.03, 1.09)   | 1.31 (1.26, 1.38)  | 1.62 (1.49, 1.76) | <0.001      |

NSAIDs, non-steroidal anti-inflammatory drug; CCI, Charlson Comorbidity Index; HCUI, health care utilization index; HR, hazard ratios; CI, confidence interval. The HRs were adjusted for age, sex, hypertension, medication, Charlson Comorbidity Index (CCI), and health care utilization index (HCUI).

**Table S5.** Characteristics of the study population after 1:2 propensity score matching.

| Characteristics               | Glucosamine non-us-ers<br>(n= 16,043) | Adherent glucosamine us-ers<br>(n= 8,022) | P value |
|-------------------------------|---------------------------------------|-------------------------------------------|---------|
|                               |                                       |                                           |         |
| Age, years, mean (SD)         | 62.02±14.04                           | 61.89±10.81                               | 0.48    |
| Female, n (%)                 | 10586 (65.99)                         | 5316 (66.27)                              | 0.66    |
| Hypertension, n (%)           | 3991 (24.88)                          | 2045 (25.49)                              | 0.30    |
| Lipid treatment, n (%)        | 7844 (48.89)                          | 3930 (48.99)                              |         |
| Antiplatelet treatment, n (%) | 6132 (38.22)                          | 3100 (38.64)                              | 0.53    |
| NSAIDs therapy, n (%)         | 5113 (31.87)                          | 2562 (31.94)                              | 0.92    |
| CCI, mean (SD)                | 0.80±1.03                             | 0.80±0.87                                 | 0.99    |
| HCUI, median (IQR)            | 17 (6, 36)                            | 14 (3, 36)                                | 0.81    |

NSAIDs, non-steroidal anti-inflammatory drug; CCI, Charlson Comorbidity Index; HCUI, health care utilization index; IQR, inter quartile range. The propensity scores for each participant between groups were calculated using a logistic regression model including the index year and all covariates.

**Table S6.** Incidence of CVD events after 1:2 propensity score matching.

|             | Glucosamine non-users<br>(n= 16,043) |                      | Adherent glucosamine users<br>(n= 8,022) |                      | HR (95%CI)        | P value |
|-------------|--------------------------------------|----------------------|------------------------------------------|----------------------|-------------------|---------|
|             | Number of events                     | Incidence (95% CI)   | Number of events                         | Incidence (95% CI)   |                   |         |
| Overall CVD | 1,978                                | 20.48 (19.58, 21.38) | 1,333                                    | 28.16 (26.65, 29.67) | 1.38 (1.29, 1.48) | <0.001  |
| CHD         | 790                                  | 7.89 (7.34, 8.45)    | 570                                      | 11.45 (10.51, 12.39) | 1.45 (1.30, 1.62) | <0.001  |
| Stroke      | 596                                  | 5.93 (5.45, 6.40)    | 353                                      | 7.00 (6.27, 7.73)    | 1.18 (1.03, 1.34) | 0.016   |

CVD, cardiovascular disease; CHD, coronary heart disease; HR, hazard ratios; CI, confidence interval.

**Table S7.** Association of glucosamine use with CVD adjusting for adherence of antidiabetic drugs.

| Outcomes | HR (95% CI)       | P value | HR (95% CI)       |                    |                   |
|----------|-------------------|---------|-------------------|--------------------|-------------------|
|          |                   |         | Non-adherent      | Partially adherent | Adherent          |
| CVD      | 1.10 (1.08, 1.11) | <0.001  | 1.04 (1.02, 1.06) | 1.25 (1.21, 1.29)  | 1.63 (1.54, 1.72) |
| CHD      | 1.12 (1.09, 1.15) | <0.001  | 1.07 (1.04, 1.10) | 1.22 (1.17, 1.28)  | 1.64 (1.51, 1.78) |
| Stroke   | 1.03 (1.00, 1.06) | 0.091   | 0.98 (0.94, 1.01) | 1.15 (1.08, 1.22)  | 1.48 (1.33, 1.65) |

CVD, cardiovascular disease; CHD, coronary heart disease; CI, confidence interval. The HRs were adjusted for age, sex, hypertension, medication, Charlson Comorbidity Index (CCI), health care utilization index (HCUI), and adherence of antidiabetic drugs.

**Table S8.** Association of glucosamine use with CVD excluding patients with <2 years follow-up period.

| Outcomes | HR (95% CI)       | P value | HR (95% CI)       |                    |                   |
|----------|-------------------|---------|-------------------|--------------------|-------------------|
|          |                   |         | Non-adherent      | Partially adherent | Adherent          |
| CVD      | 1.10 (1.08, 1.11) | <0.001  | 1.07 (1.05, 1.09) | 1.22 (1.18, 1.26)  | 1.58 (1.48, 1.68) |
| CHD      | 1.12 (1.09, 1.15) | <0.001  | 1.10 (1.07, 1.13) | 1.19 (1.13, 1.25)  | 1.62 (1.48, 1.79) |
| Stroke   | 1.03 (0.99, 1.06) | 0.11    | 1.01 (0.98, 1.05) | 1.12 (1.05, 1.2)   | 1.37 (1.21, 1.55) |

CVD, cardiovascular disease; CHD, coronary heart disease; CI, confidence interval. The HRs were adjusted for age, sex, hypertension, medication, Charlson Comorbidity Index (CCI), and health care utilization index (HCUI).

**Table S9.** Association of glucosamine use with CVD including all patients newly diagnosed with osteoarthritis.

| Outcomes | HR (95% CI)       | P value | HR (95% CI)       |                    |                   |
|----------|-------------------|---------|-------------------|--------------------|-------------------|
|          |                   |         | Non-adherent      | Partially adherent | Adherent          |
| CVD      | 1.15 (1.13, 1.17) | <0.001  | 1.09 (1.07, 1.11) | 1.33 (1.30, 1.37)  | 1.75 (1.66, 1.84) |
| CHD      | 1.17 (1.14, 1.20) | <0.001  | 1.12 (1.09, 1.14) | 1.32 (1.26, 1.37)  | 1.72 (1.60, 1.86) |
| Stroke   | 1.08 (1.05, 1.11) | <0.001  | 1.03 (1.00, 1.06) | 1.22 (1.16, 1.28)  | 1.61 (1.46, 1.77) |

CVD, cardiovascular disease; CHD, coronary heart disease; CI, confidence interval. The HRs were adjusted for age, sex, hypertension, medication, Charlson Comorbidity Index (CCI), and health care utilization index (HCUI). All patients newly diagnosed with osteoarthritis were included whether or not they took glucosamine within one year.

**Table S10.** Association of glucosamine use with CVD from the diagnosis of osteoarthritis to the outcomes.

| Outcomes | HR (95% CI)       | P value | HR (95% CI)       |                    |                   |
|----------|-------------------|---------|-------------------|--------------------|-------------------|
|          |                   |         | Non-adherent      | Partially adherent | Adherent          |
| CVD      | 1.11 (1.09, 1.13) | <0.001  | 1.05 (1.03, 1.07) | 1.27 (1.23, 1.31)  | 1.70 (1.61, 1.81) |
| CHD      | 1.13 (1.10, 1.16) | <0.001  | 1.08 (1.05, 1.12) | 1.24 (1.18, 1.31)  | 1.72 (1.57, 1.88) |
| Stroke   | 1.04 (1.00, 1.07) | 0.044   | 0.98 (0.95, 1.02) | 1.17 (1.10, 1.25)  | 1.54 (1.37, 1.73) |

CVD, cardiovascular disease; CHD, coronary heart disease; CI, confidence interval. The HRs were adjusted for age, sex, hypertension, medication, Charlson Comorbidity Index (CCI), and health care utilization index (HCUI). The follow-up time was re-defined separately as the period from the diagnosis of osteoarthritis to the outcomes.
